# Supplementary material for: Improving the carrier stability and drug loading of unimolecular micelle-based nanotherapeutics for acid-activated drug delivery and enhanced antitumor therapy
Source: Royal Society of Chemistry journal article supplement (doi:10.1039/c8tb01384e), 2018-01-01
Supplement: c8tb01384e1.pdf [file c8tb01384e1.pdf]

## Supporting Information

### Improving the Carrier Stability and Drug Loading of Unimolecular Micelle-based Nanotherapeutic for Acid- activated Drug Delivery and Enhanced Antitumor Therapy

*Xiaoxiao Shi<sup>a, b</sup>, Shuang Bai<sup>a, b</sup>, Cangjie Yang<sup>c</sup>, Xiaoqian Ma<sup>a, b</sup>, Meili Hou<sup>a, b</sup>, Jiucun  
Chen<sup>a, b</sup>, Peng Xue<sup>a, b</sup>, Chang Ming Li<sup>a, b</sup>, Yuejun Kang<sup>a, b\*</sup>, Zhigang Xu<sup>a, b\*</sup>*

<sup>a</sup>Institute for Clean Energy and Advanced Materials, Faculty of Materials and Energy,  
Southwest University, Chongqing 400715, P. R. China

<sup>b</sup>Chongqing Engineering Research Centre for Micro-Nano Biomedical Materials and  
Devices, Chongqing 400715, P.R. China.

<sup>c</sup>School of Chemical and Biomedical Engineering, Nanyang Technological  
University, 62 Nanyang Drive, Singapore 637459, Singapore

\*Corresponding Authors

Z. Xu ([zgxu@swu.edu.cn](mailto:zgxu@swu.edu.cn)); Fax: +86-23-68253204; Tel: +86-23-68253792

Y. Kang ([yjkang@swu.edu.cn](mailto:yjkang@swu.edu.cn)); Fax: +86-23-68253204; Tel: +86-23-68254056

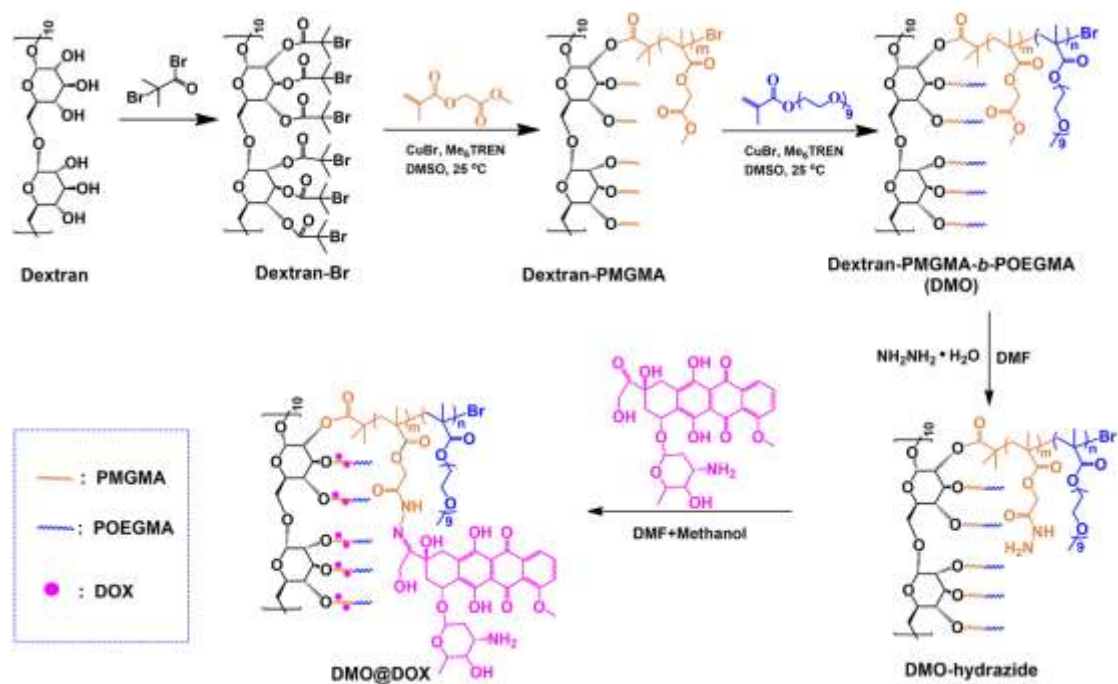

**Figure S1.** The synthetic route of rod-like DMO@DOX polymeric prodrug.

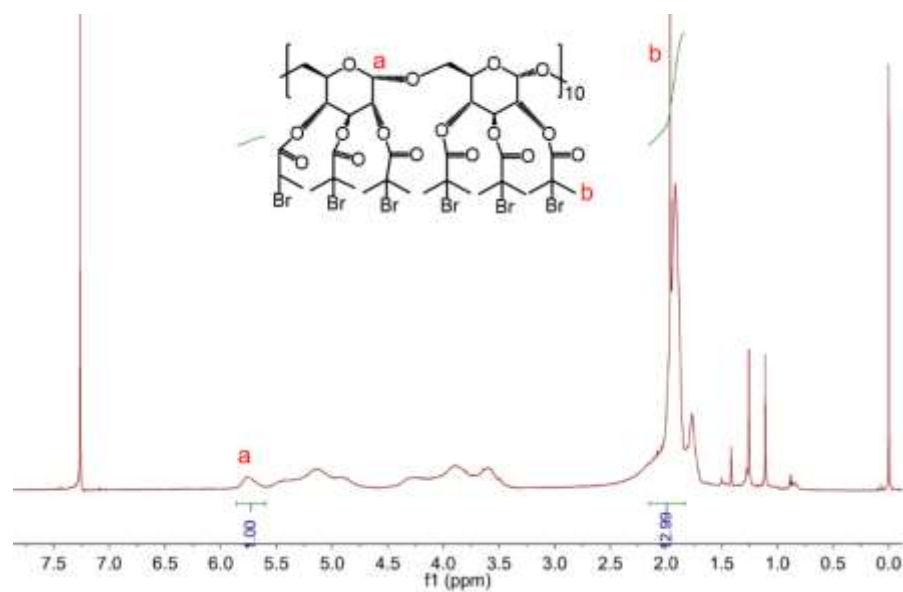

**Figure S2.** The  $^1\text{H}$  NMR spectrum of DEX-Br macroinitiator.

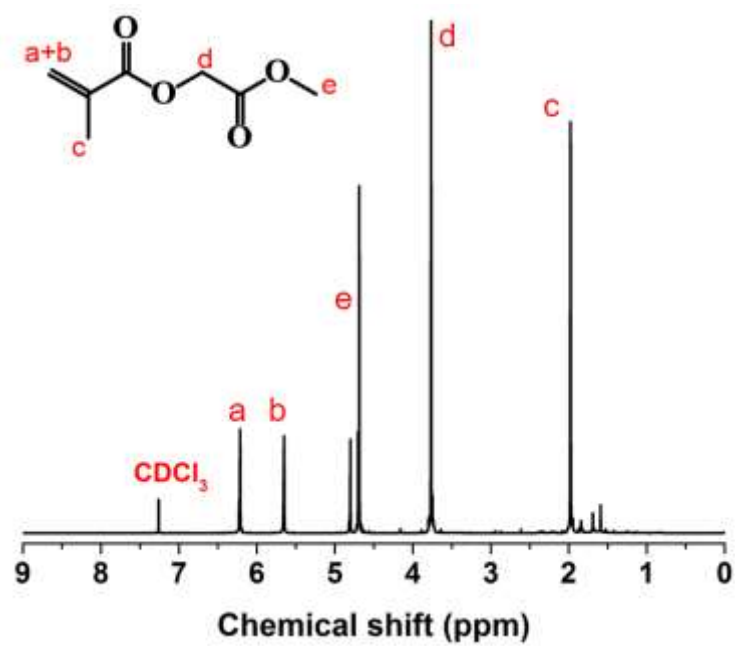

**Figure S3.** The  $^1\text{H}$  NMR spectrum of MGMA monomer.

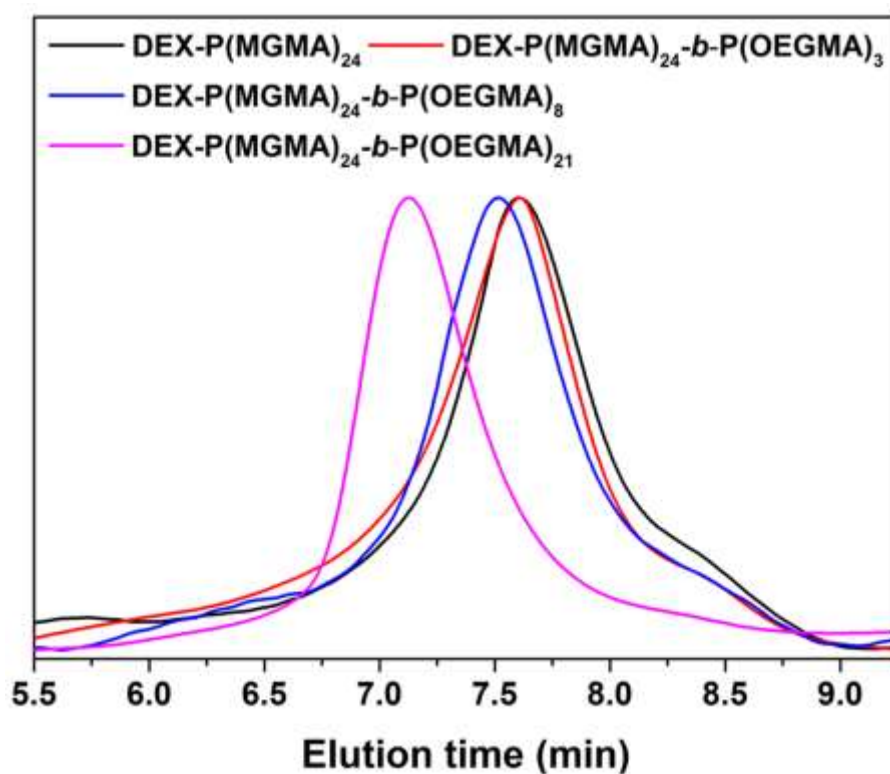

**Figure S4.** GPC traces of DEX-PMGMA<sub>24</sub> and DEX-P(MGMA)<sub>24</sub>-*b*-P(OEGMA)<sub>3</sub> (DMO-1), DEX-P(MGMA)<sub>24</sub>-*b*-P(OEGMA)<sub>8</sub> (DMO-2) and DEX-P(MGMA)<sub>24</sub>-*b*-P(OEGMA)<sub>21</sub> (DMO-3).

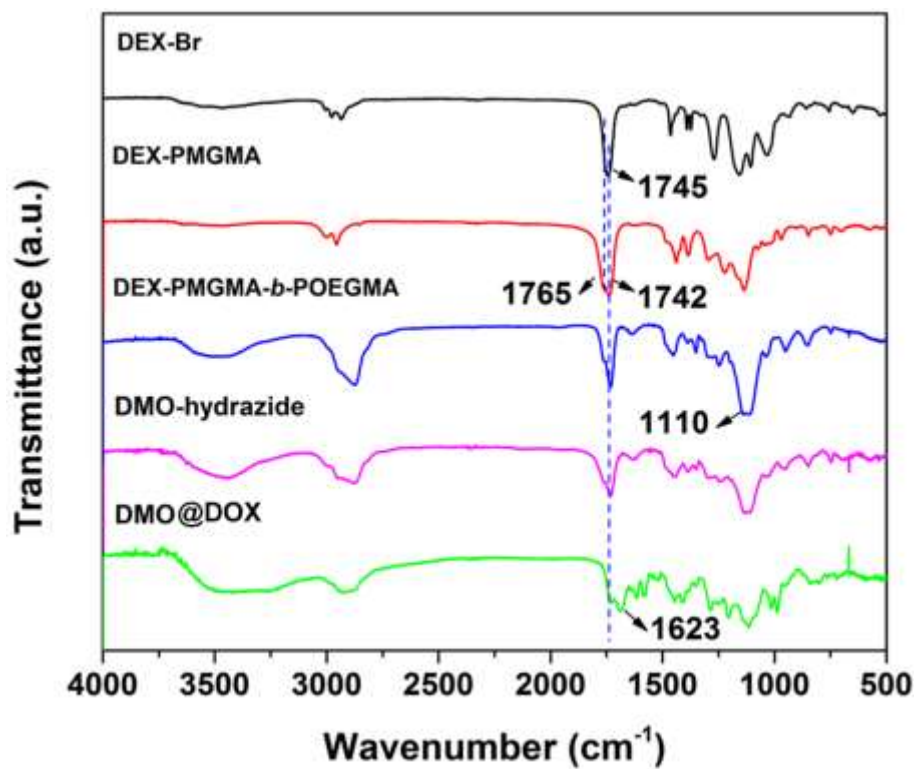

**Figure S5.** Typical FTIR spectra of DEX-Br, DEX-PMGMA, DEX-PMGMA-*b*-POEGMA (DMO), DMO-hydrazide and DMO@DOX, respectively.

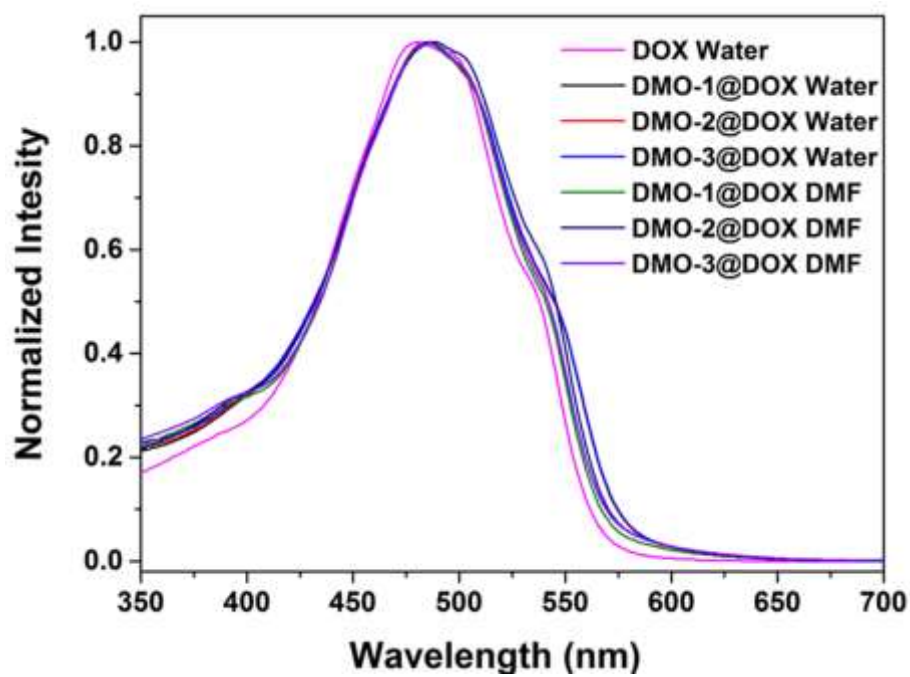

**Figure S6.** UV-vis spectra of free DOX, DMO-1@DOX, DMO-2@DOX and DMO-3@DOX prodrugs in water or DMF solution.

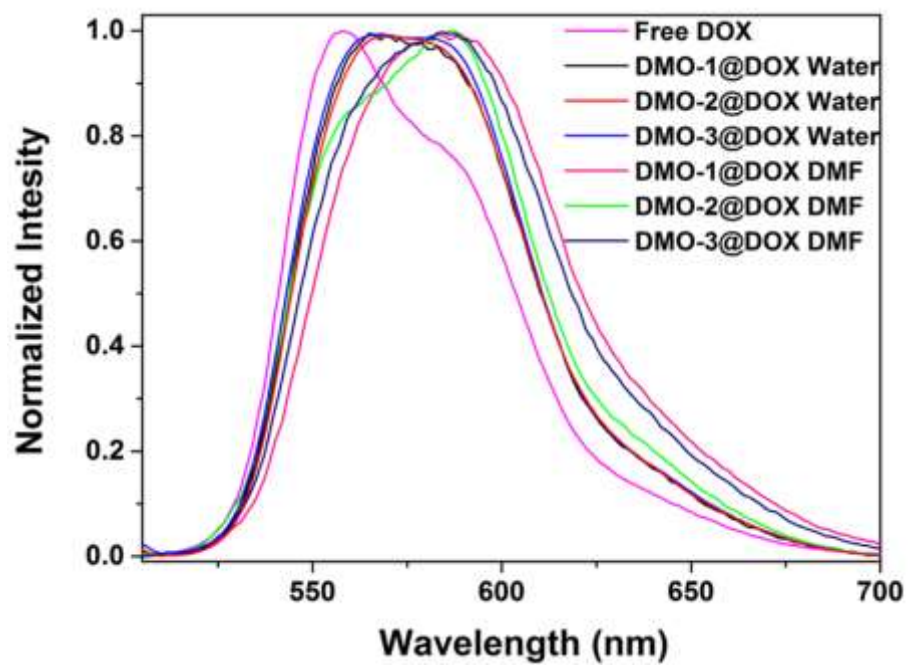

**Figure S7.** The fluorescence spectra of free DOX, DMO-1 @DOX, DMO-2@DOX and DMO-3@DOX prodrugs in water or DMF solution.



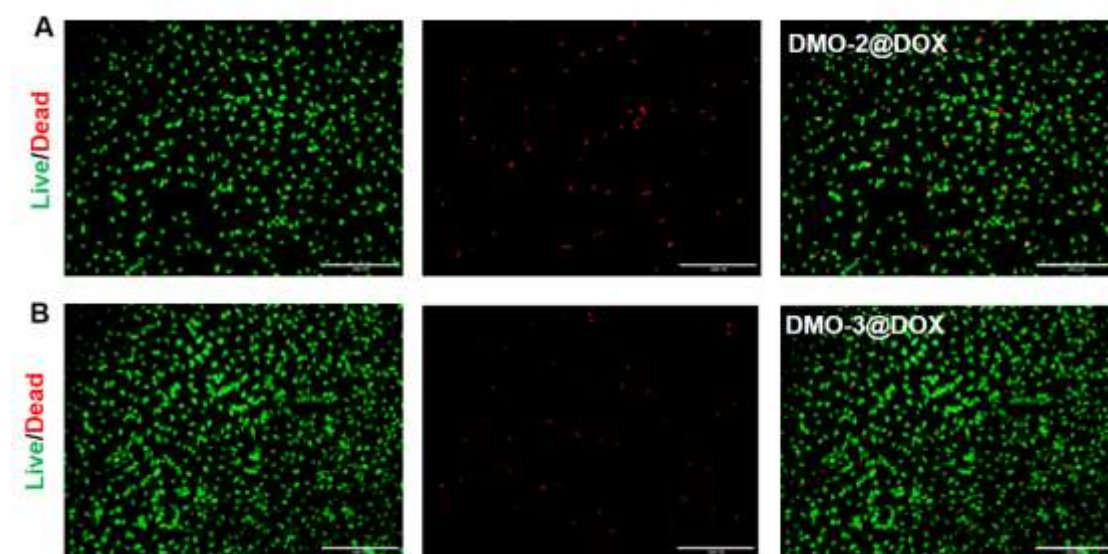

**Figure S8.** Fluorescence images of HeLa cells incubated with (A) DMO-2@DOX UMIs and (B) DMO-3@DOX UMIs for 24 h, respectively (final equivalent DOX concentration: 15  $\mu\text{g/mL}$ ). The fluorescence of Calcein AM (live cells) and PI (dead cells) were labelled as green and red, respectively. Scale bars: 200  $\mu\text{m}$ .

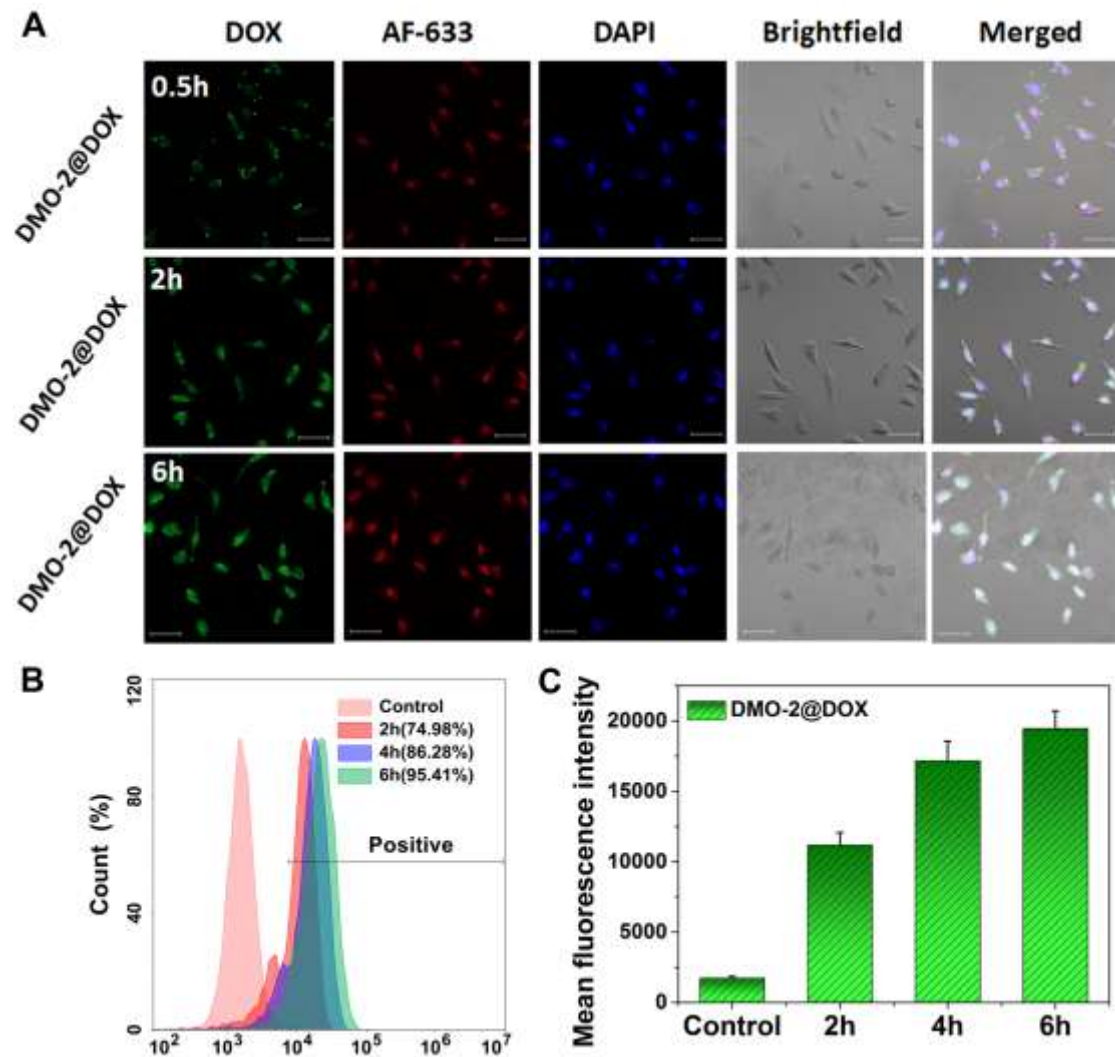

**Figure S9.** (A) CLSM images showing the distribution of free DOX and DMO-2@DOX UMs in HeLa cells (final equivalent DOX concentration: 20  $\mu\text{g/mL}$ ). Cell nuclei and cytoplasm were stained with DAPI (Blue) and AF-633 (Red), respectively. Scale bars: 50  $\mu\text{m}$ . (B) Flow cytometry analysis and (C) the mean fluorescence intensity of DMO-2@DOX treated HeLa cells at 2, 4 and 6 h (data are presented as means  $\pm$  SD,  $n=3$ ).

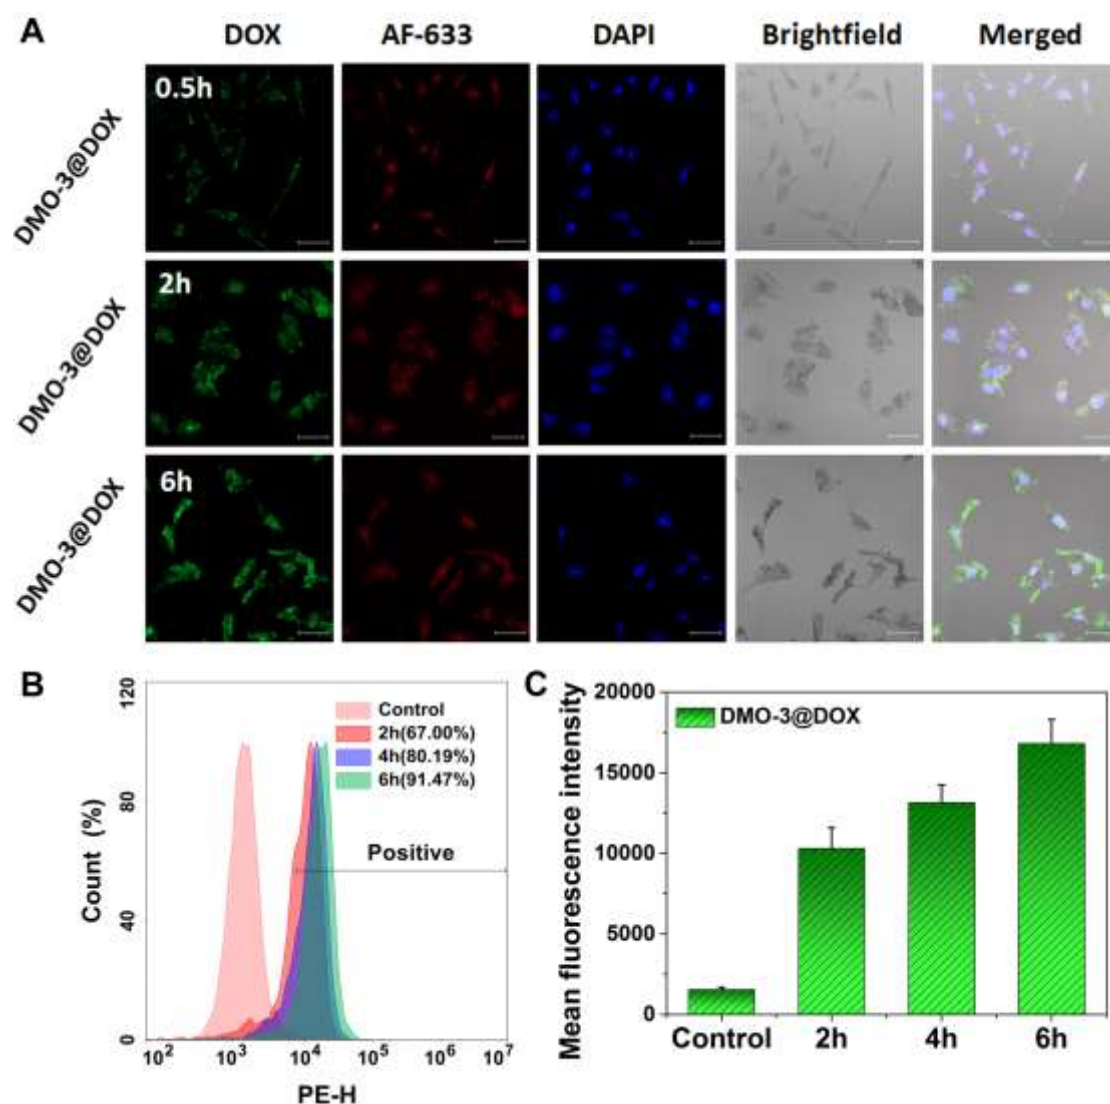

**Figure S10** (A) CLSM images showing the distribution of free DOX and DMO-3@DOX UMs in HeLa cells (final equivalent DOX concentration: 20  $\mu\text{g/mL}$ ). Cell nuclei and cytoplasm were stained with DAPI (Blue) and AF-633 (Red), respectively. Scale bars: 50  $\mu\text{m}$ . (B) Flow cytometry analysis and (C) the mean fluorescence intensity of DMO-3@DOX treated HeLa cells at 2, 4 and 6 h (data are presented as means  $\pm$  SD,  $n=3$ ).

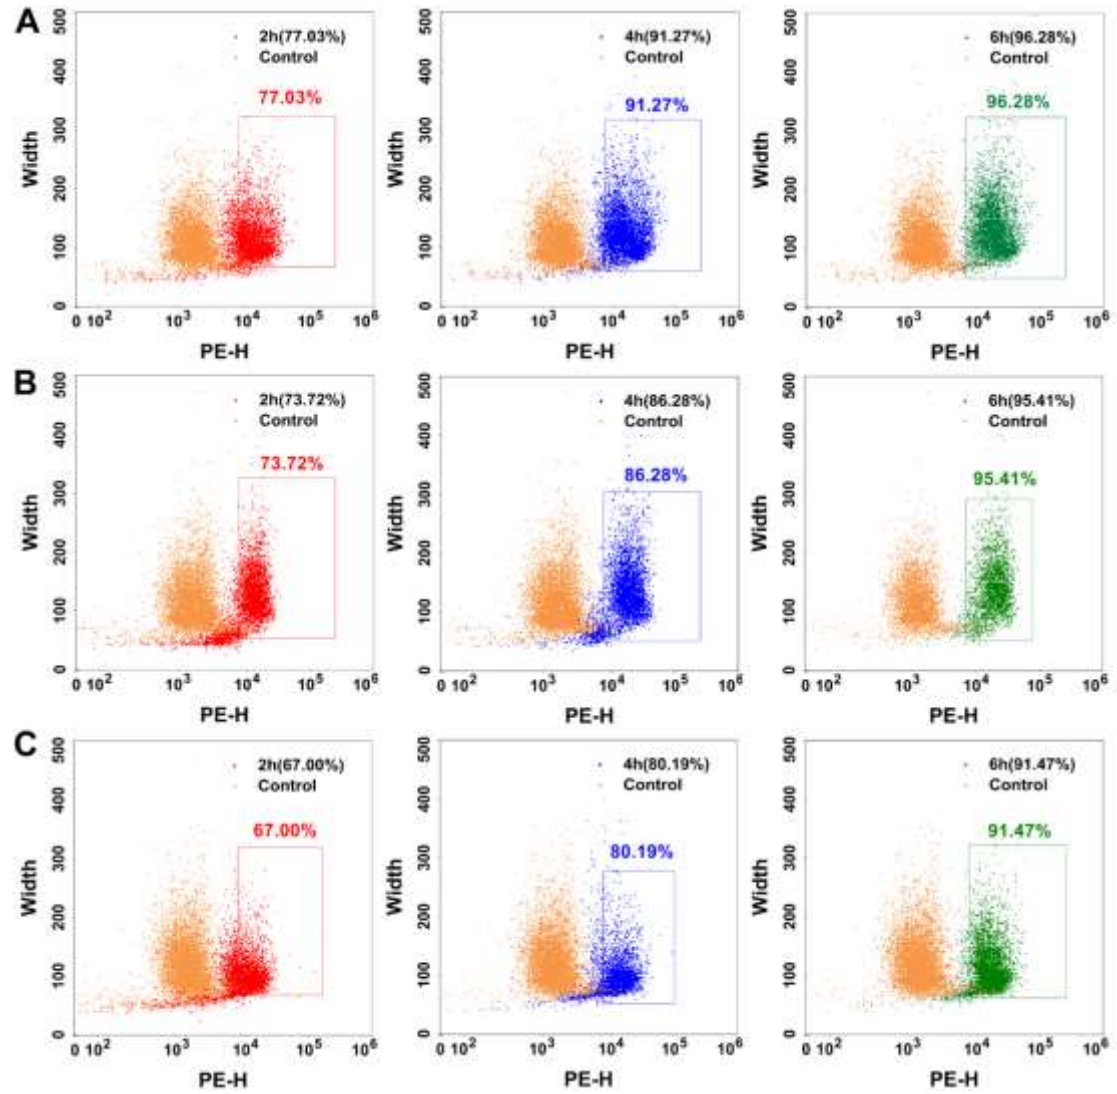

**Figure S11** Flow cytometry dot plots for HeLa cells treated with (A) DMO-@DOX, (B) DMO-2@DOX and (C) DMO-3@DOX UMIs under different incubation time.

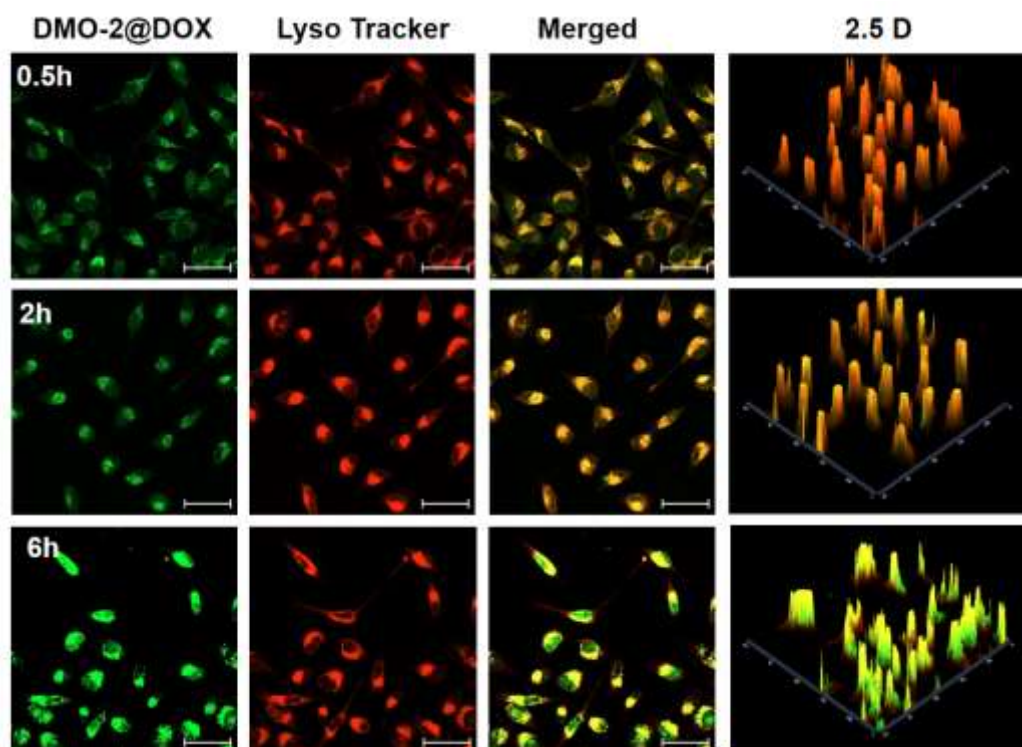

**Figure S12** CLSM images showing the time-dependent accumulation process of DMO-2@DOX UMs using Lyso Tracker as the tracer (final equivalent DOX concentration: 20  $\mu\text{g/mL}$ ). Scale bars: 50  $\mu\text{m}$ .



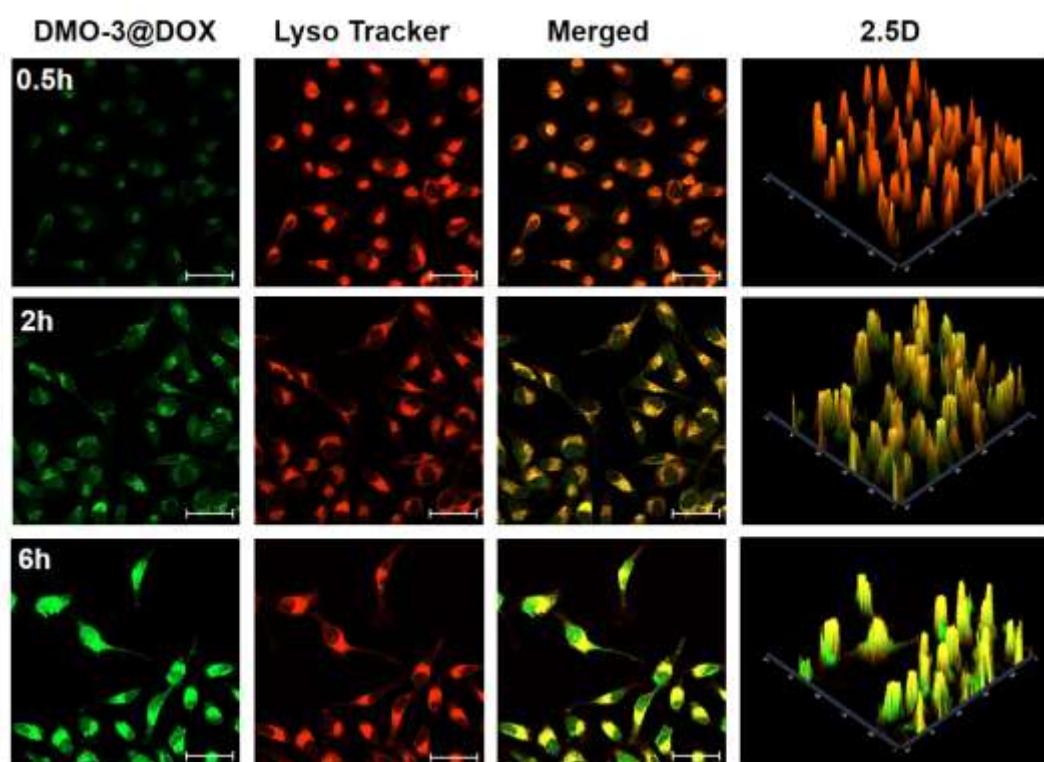

**Figure S13** CLSM images showing the time-dependent accumulation process of DMO-2@DOX UMs using Lyso Tracker as the tracer (final equivalent DOX concentration: 20  $\mu\text{g/mL}$ ). Scale bars: 50  $\mu\text{m}$ .

**Table S1.** Structural information of the rod-like DMO@DOX prodrug and their precursors

|                                                              | $M_{n, NMR}^b$         | $M_{n, GPC}^c$         | $M_w/M_n^d$ | $D^e$   | $D^f$ | $LC^g$ (wt%) |
|--------------------------------------------------------------|------------------------|------------------------|-------------|---------|-------|--------------|
| Polymer <sup>a</sup>                                         | (g mol <sup>-1</sup> ) | (g mol <sup>-1</sup> ) |             | (Water) | (DMF) |              |
| DEX-P(MGMA) <sub>24</sub>                                    | 252900                 | 38900                  | 1.46        | —       | —     | —            |
| DEX-P(MGMA) <sub>24</sub> - <i>b</i> -P(OEGMA) <sub>3</sub>  | 339200                 | 42900                  | 1.56        | 34.83   | 45.89 | 80.4         |
| DEX-P(MGMA) <sub>24</sub> - <i>b</i> -P(OEGMA) <sub>8</sub>  | 496900                 | 48500                  | 1.28        | 41.35   | 55.96 | 72.2         |
| DEX-P(MGMA) <sub>24</sub> - <i>b</i> -P(OEGMA) <sub>21</sub> | 912200                 | 95500                  | 1.24        | 68.01   | 74.23 | 40.4         |

<sup>a</sup> DP<sub>n</sub> of polymerized alternating units (MGMA or OEGMA) and <sup>b</sup>  $M_{n, NMR}$  was measured by <sup>1</sup>H NMR results. <sup>c</sup>  $M_{n, GPC}$  and <sup>d</sup>  $M_w/M_n$  were measured by GPC. <sup>e</sup> Hydrodynamic diameter of prodrug micelles were determined by DLS. <sup>f</sup> The loading content (LC) were determined by Fluorescence (FL) spectrophotometer, respectively.

**Table S2.** IC<sub>50</sub> value of free DOX and DMO@DOX prodrug. <sup>a</sup>

| Sample    | IC <sub>50</sub> (HeLa) | IC <sub>50</sub> (MCF-7) | IC <sub>50</sub> (HUVEC) |
|-----------|-------------------------|--------------------------|--------------------------|
|           | μg/ml                   | μg/ml                    | μg/ml                    |
| Free DOX  | 0.072                   | 0.06                     | 0.075                    |
| DMO-1@DOX | 1.61                    | 0.77                     | >10                      |
| DMO-2@DOX | 0.65                    | 1.75                     | >10                      |
| DMO-3@DOX | 0.83                    | 1.91                     | >10                      |

a: IC<sub>50</sub> value of free DOX, DMO-1@DOX, DMO-2@DOX and DMO-3@DOX determined in HeLa cells, MCF-7 cells and HUVEC cells by PrestoBlue assay, and cells were incubated with samples for 72 h.
